# Supplementary material for: Pregnancy‐Related Risk Factors Are Associated With a Significant Burden of Treated Hypertension Within 10 Years of Delivery: Findings From a Population‐Based Norwegian Cohort
Source: PubMed Central journal article supplement — J Am Heart Assoc. 2018 May 13;7(10):e008318. doi: 10.1161/JAHA.117.008318 (PMC6015329; doi:10.1161/jaha.117.008318), 2018-05-13
Supplement: JAH3-7-e008318-s001.pdf [file JAH3-7-e008318-s001.pdf]

# **SUPPLEMENTAL MATERIAL**

**Table S1. Hazard ratios (95% CI) of pharmacologically-treated hypertension\* by preeclampsia/eclampsia and gestational hypertension stratified by gestational age and weight-for-gestational age categories: MoBa Cohort Study (60,027 women with deliveries 2004-2009 in Norway).**

| Risk Factor                                        | Preeclampsia/eclampsia or gestational hypertension |       |                      |                      |           |       |                      |                      |
|----------------------------------------------------|----------------------------------------------------|-------|----------------------|----------------------|-----------|-------|----------------------|----------------------|
|                                                    | <u>Yes</u>                                         |       |                      |                      | <u>No</u> |       |                      |                      |
|                                                    | N                                                  | Cases | Model 1 <sup>†</sup> | Model 2 <sup>‡</sup> | N         | Cases | Model 1 <sup>†</sup> | Model 2 <sup>‡</sup> |
| Gestational age (weeks)                            |                                                    |       |                      |                      |           |       |                      |                      |
| < 32                                               | 106                                                | 22    | 14.33 (9.03-22.70)   | 12.68 (7.70-20.89)   | 341       | 14    | 2.27 (1.33-3.85)     | 2.15 (1.24- 3.74)    |
| 32 – 36                                            | 490                                                | 72    | 9.25 (7.22-11.86)    | 7.94 (5.97-10.56)    | 2,361     | 62    | 1.45 (1.12-1.87)     | 1.42 (1.07-1.88)     |
| ≥ 37                                               | 2,766                                              | 345   | 8.01 (7.08-9.06)     | 6.19 (5.38-7.13)     | 53,700    | 956   | 1.00 (reference)     | 1.00 (reference)     |
| Weight-for-gestational age categories <sup>§</sup> |                                                    |       |                      |                      |           |       |                      |                      |
| < 2.5%                                             | 159                                                | 18    | 6.69 (4.19-10.70)    | 5.26 (3.03-9.13)     | 695       | 12    | 0.93 (0.53-1.63)     | 0.80 (0.41-1.55)     |
| 2.5 – 9.9%                                         | 392                                                | 45    | 6.91 (5.11-9.37)     | 6.14 (4.42-8.52)     | 2,986     | 36    | 0.68 (0.48-0.94)     | 0.67 (0.46-0.98)     |
| ≥ 10%                                              | 2,811                                              | 376   | 8.24 (7.31-9.29)     | 6.38 (5.56-7.31)     | 52,688    | 984   | 1.00 (reference)     | 1.00 (reference)     |

CI indicates confidence interval.

\* Identified through antihypertensive medications dispensed following pregnancy where hypertension listed as indication for treatment. When medication dispensed only during the post-partum period of < 3 months individuals were coded normotensive.

†Adjusted for maternal age (yrs).

‡Adjusted for maternal age (yrs), prepregnancy body mass index ( $\text{kg}/\text{m}^2$ ), educational level (primary, secondary/vocational, and any college/university), physical activity (<3 times, and 3 or more times/week), daily smoking (yes v. no), alcohol consumption frequency (less than monthly, monthly, weekly), duration of prepregnancy oral contraceptive use (never, < 4 years, 4 or more years), poor diet quality (yes v. no), energy intake (Kcal/d), and multiple birth pregnancy.

§Using national birth weight by gestational age and sex growth curves (very small, < 2.5%, moderate small 2.5-9.9%, and not small  $\geq 10\%$ ).<sup>1</sup>

**Table S2. Pregnancy-related events hazard ratios (95% CI) for pharmacologically-treated hypertension\* within 10 years following delivery among women with a healthy prepregnancy body mass index: MoBa Cohort Study (38,559 women with deliveries 2004-2009 in Norway).**

| Women with prepregnant body mass index 18.5 – 24.9 kg/m <sup>2</sup> |        |        |                      |                      |
|----------------------------------------------------------------------|--------|--------|----------------------|----------------------|
| Risk Factor                                                          | N      | Cases* | Model 1 <sup>†</sup> | Model 2 <sup>‡</sup> |
| <i>De novo</i> hypertensive disorders of pregnancy                   |        |        |                      |                      |
| None                                                                 | 36,908 | 406    | 1.00 (reference)     | 1.00 (reference)     |
| PE                                                                   | 1,037  | 77     | 7.61 (5.95-9.74)     | 8.40 (6.49-10.88)    |
| GH                                                                   | 614    | 66     | 11.55 (8.90-14.98)   | 12.07 (9.09-16.03)   |
| DM/GDM                                                               |        |        |                      |                      |
| No                                                                   | 38,200 | 530    | 1.00 (reference)     | 1.00 (reference)     |
| Yes                                                                  | 359    | 19     | 3.89 (2.47-6.15)     | 3.36 (2.05-5.51)     |
| Preterm delivery                                                     |        |        |                      |                      |
| No                                                                   | 36,410 | 490    | 1.00 (reference)     | 1.00 (reference)     |
| Yes (<37 weeks)                                                      | 1,983  | 55     | 2.05 (1.55-2.71)     | 2.19 (1.59-3.02)     |
| < 32 weeks                                                           | 263    | 9      | 2.49 (1.28-4.83)     | 2.64 (1.28-5.47)     |
| 32-36 weeks                                                          | 1,720  | 46     | 2.00 (1.48-2.71)     | 2.15 (1.53-3.01)     |
| Weight-for-gestational age and sex <sup>§</sup>                      |        |        |                      |                      |
| All small (<10%)                                                     | 2,902  | 44     | 1.14 (0.83-1.55)     | 0.70 (0.48-1.00)     |
| <2.5%                                                                | 569    | 14     | 1.82 (1.07-3.09)     | 0.92 (0.50-1.66)     |
| 2.5-9.9%                                                             | 2,333  | 30     | 0.97 (0.67-1.40)     | 0.62 (0.40-0.95)     |
| Average (10-90%)                                                     | 32,078 | 440    | 1.00 (reference)     | 1.00 (reference)     |
| Large (>90%)                                                         | 3,392  | 61     | 1.24 (0.95-1.62)     | 1.01 (0.74-1.37)     |

CI indicates confidence interval; PE, preeclampsia/eclampsia; GH, gestational hypertension; DM/GDM, pregestational and gestational diabetes mellitus or type not specified.

\*Identified through antihypertensive medications dispensed following pregnancy where hypertension listed as indication for treatment. When medication dispensed only during the post-partum period of < 3 months individuals were coded normotensive.

†Adjusted for maternal age.

‡Adjusted for maternal age, prepregnancy body mass index ( $\text{kg}/\text{m}^2$ ), educational level (primary, secondary/vocational, and any college/university), physical activity (<3 times, and 3 or more times/week), daily smoking (yes v. no), alcohol consumption frequency (less than monthly, monthly, weekly), duration of prepregnancy oral contraceptive use (never, < 4 years, 4 or more years), and a low dietary intake of minerals (yes v. no), energy intake (Kcal/d), and multiple birth pregnancy. For all non-hypertensive pregnancy risk factors, adjusts for hypertensive disorders of pregnancy.

§Using national birth weight by gestational age and sex growth curves.<sup>1</sup>

**Table S3. Pregnancy-related event hazard ratios (95% CI) for pharmacologically-treated hypertension\* within 5 years following delivery in nulliparous women at baseline: MoBa Cohort Study (26,023 women with deliveries 2004-2009 in Norway).**

| Follow-up $\leq$ 5 years for nulliparous women at baseline |        |        |                      |                      |
|------------------------------------------------------------|--------|--------|----------------------|----------------------|
| Risk Factor                                                | N      | Cases* | Model 1 <sup>†</sup> | Model 2 <sup>‡</sup> |
| <i>De novo</i> hypertensive disorders of pregnancy         |        |        |                      |                      |
| None                                                       | 23,964 | 176    | 1.00 (reference)     | 1.00 (reference)     |
| PE                                                         | 1,346  | 107    | 9.31 (7.39-11.72)    | 6.97 (5.31-9.14)     |
| GH                                                         | 713    | 44     | 5.50 (4.01-7.55)     | 4.31 (3.05-6.08)     |
| DM/GDM                                                     |        |        |                      |                      |
| No                                                         | 25,625 | 303    | 1.00 (reference)     | 1.00 (reference)     |
| Yes                                                        | 398    | 24     | 4.87 (3.22-7.38)     | 3.22 (2.07-5.02)     |
| Preterm delivery                                           |        |        |                      |                      |
| No                                                         | 24,152 | 268    | 1.00 (reference)     | 1.00 (reference)     |
| Yes (all <37 weeks)                                        | 1,726  | 57     | 2.93 (2.20-3.91)     | 1.88 (1.35-2.63)     |
| < 32 weeks                                                 | 265    | 15     | 5.03 (2.97-8.52)     | 2.62 (1.45-4.73)     |
| 32-36 weeks                                                | 1,461  | 42     | 2.55 (1.84-3.54)     | 1.73 (1.19-2.52)     |
| Weight-for-gestational age and sex <sup>§</sup>            |        |        |                      |                      |
| All small (< 10%)                                          | 2,644  | 42     | 1.26 (0.91-1.74)     | 0.92 (0.65-1.29)     |
| <2.5%                                                      | 548    | 12     | 1.71 (0.96-3.04)     | 0.89 (0.48-1.67)     |
| 2.5 – 9.9%                                                 | 2,096  | 30     | 1.14 (0.78-1.66)     | 0.93 (0.67-1.37)     |
| Average (10-90%)                                           | 21,507 | 263    | 1.00 (reference)     | 1.00 (reference)     |
| Large (>90%)                                               | 1,714  | 20     | 0.97 (0.61-1.52)     | 0.60 (0.35-1.01)     |

CI indicates confidence interval; PE, preeclampsia/eclampsia; GH, gestational hypertension;

DM/GDM, pregestational and gestational diabetes mellitus or type not specified.

\*Identified through antihypertensive medications dispensed following pregnancy where hypertension listed as indication for treatment. When medication dispensed only during the post-partum period of < 3 months individuals were coded normotensive.

†Adjusted for maternal age.

‡Adjusted for maternal age, prepregnancy body mass index (kg/m<sup>2</sup>), educational level (primary, secondary/vocational, and any college/university), physical activity (<3 times, and 3 or more times/week), daily smoking (yes v. no), alcohol consumption frequency (less than monthly, monthly, weekly), duration of prepregnancy oral contraceptive use (never, < 4 years, 4 or more years), and a low dietary intake of minerals (yes v. no), energy intake (kilocalories/d), and multiple birth pregnancy. For all non-hypertensive pregnancy risk factors, adjusts for hypertensive disorders of pregnancy.

§Using national birth weight by gestational age and sex growth curves.<sup>1</sup>

**Table S4. Hazard ratios (95% CI) of pharmacologically-treated hypertension\* with respect to pregnancy-related risk factors by sequentially longer lengths of follow-up: MoBa Cohort (60,027 women with deliveries 2004-2009 in Norway).**

| Risk Factors                  | Length of follow-up |                   |                  |                  |
|-------------------------------|---------------------|-------------------|------------------|------------------|
|                               | 4 yrs               | 6 yrs             | 8 yrs            | 10 yrs           |
| PE/GH combined                |                     |                   |                  |                  |
| Model 1 <sup>†</sup>          | 11.39 (9.88-13.13)  | 9.26 (8.17-10.49) | 8.38 (7.47-9.41) | 8.13 (7.27-9.09) |
| Model 2 <sup>‡</sup>          | 9.40 (8.00-11.04)   | 7.45 (6.46-8.58)  | 6.62 (5.80-7.55) | 6.38 (5.62-7.26) |
| DM/GDM                        |                     |                   |                  |                  |
| Model 1 <sup>†</sup>          | 4.34 (3.29-5.74)    | 4.23 (3.32-5.39)  | 4.22 (3.39-5.26) | 4.08 (3.29-5.06) |
| Model 2 <sup>‡,§</sup>        | 2.45 (1.82-3.31)    | 2.43 (1.86-3.16)  | 2.44 (1.90-3.12) | 2.43 (1.91-3.10) |
| Preterm delivery <sup>l</sup> |                     |                   |                  |                  |
| Model 1 <sup>†</sup>          | 3.14 (2.59-3.81)    | 2.55 (2.13-3.04)  | 2.39 (2.03-2.81) | 2.25 (1.92-2.64) |
| Model 2 <sup>‡,§</sup>        | 1.89 (1.51-2.36)    | 1.60 (1.30-1.97)  | 1.56 (1.29-1.90) | 1.45 (1.19-1.76) |
| Combined group <sup>#</sup>   |                     |                   |                  |                  |
| Model 1 <sup>†</sup>          | 6.88 (5.99-7.91)    | 5.68 (5.04-6.40)  | 5.23 (4.69-5.83) | 5.02 (4.52-5.57) |
| Model 2 <sup>‡</sup>          | 5.94 (5.08-6.95)    | 4.77 (4.16-5.46)  | 4.36 (3.85-4.93) | 4.17 (3.70-4.70) |

CI indicates confidence interval; PE, preeclampsia/eclampsia; GH, gestational hypertension; DM/GDM, pregestational and gestational diabetes mellitus or type not specified.

\*Identified through antihypertensive medications dispensed following pregnancy where hypertension listed as indication for treatment. When medication dispensed only during the post-partum period of < 3 months individuals were coded normotensive.

†Adjusted for maternal age (yrs).

‡Adjusted for maternal age, prepregnancy body mass index ( $\text{kg}/\text{m}^2$ ), educational level (primary, secondary/vocational, and any college/university), physical activity (<3 times, and 3 or more times/week), daily smoking (yes v. no), alcohol consumption frequency (less than monthly, monthly, weekly), duration of prepregnancy oral contraceptive use (never, < 4 years, 4 or more years), poor diet quality (yes v. no), energy intake (kilocalories/d), and multiple birth pregnancy.

§Additional adjustment for PE/GH.

<sup>1</sup>Less than 37 weeks gestational age.

<sup>#</sup>Having one or more of the following: PE/GH, DM/GDM, or preterm delivery.

**Supplemental Reference:**

1. Skjaerven R, Gjessing HK, Bakketeig LS. Birthweight by gestational age in Norway.  
*Acta Obstet Gynecol Scand.* 2000;79:440-9.
